# Supplementary material for: Identification of Radil as a Ras binding partner and putative activator
Source: PubMed Central journal article supplement (PMC7949112; doi:10.1016/j.jbc.2021.100314), 2021-01-20
Supplement: mmc3.pdf [file mmc3.pdf]

**A**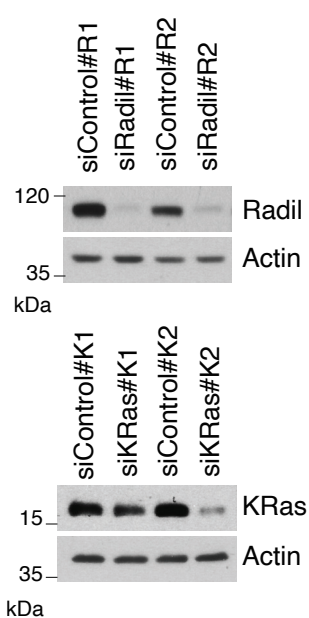**B**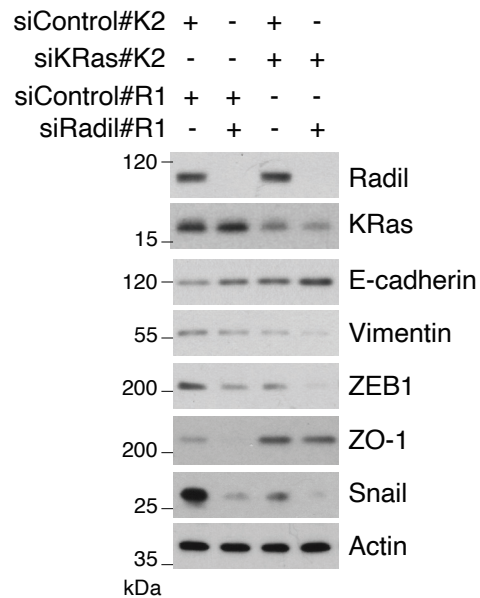**C**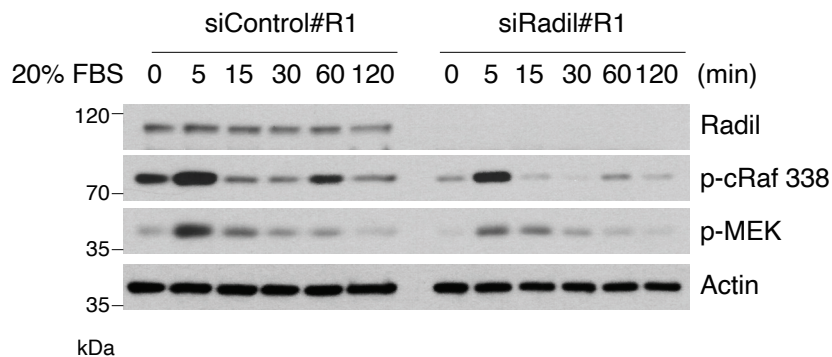**D**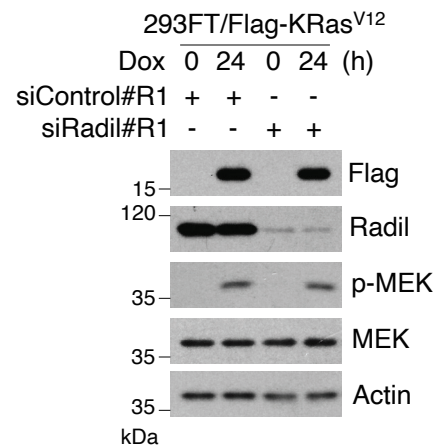

Figure S1

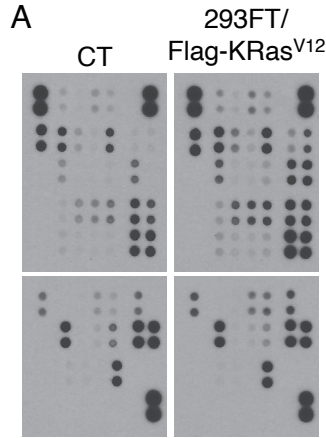

**B**

| Position | Target/Control           | Phosphorylation Site  |
|----------|--------------------------|-----------------------|
| A1, A2   | Reference Spot           | positive              |
| A3, A4   | p38a                     | T180/Y182             |
| A5, A6   | ERK1/2                   | T202/Y204, T185/ Y187 |
| A7, A8   | JNK 1/2/3                | T183/Y185, T221/ Y223 |
| A9, A10  | GSK-3 $\alpha$ / $\beta$ | S21/S9                |
| B3, B4   | EGF R                    | Y1086                 |
| B5, B6   | MSK1/2                   | S376/S360             |
| B7, B8   | AMPK $\alpha$ 1          | T183                  |
| B9, B10  | Akt                      | S473                  |
| C1, C2   | TOR                      | S2448                 |
| C3, C4   | CREB                     | S133                  |
| C5, C6   | HSP27                    | S78/S82               |
| C7, C8   | AMPK $\alpha$ 2          | T172                  |
| C9, C10  | $\beta$ -Catenin         | total                 |
| D1, D2   | Src                      | Y419                  |
| D3, D4   | Lyn                      | Y397                  |
| D5, D6   | Lck                      | Y394                  |
| D7, D8   | STAT2                    | Y689                  |
| D9, D10  | STAT5a                   | Y694                  |
| E1, E2   | Fyn                      | Y420                  |
| E3, E4   | Yes                      | Y426                  |
| E5, E6   | Fgr                      | Y412                  |
| E7, E8   | STAT6                    | Y641                  |
| E9, E10  | STAT5b                   | Y699                  |
| F1, F2   | Hck                      | Y411                  |
| F3, F4   | Chk-2                    | T68                   |
| F5, F6   | FAK                      | Y397                  |
| F7, F8   | PDGF R $\beta$           | Y751                  |
| F9, F10  | STAT5a/b                 | Y694/Y699             |
| G1, G2   | Reference Spot           | positive              |
| G3, G4   | PRAS40                   | T246                  |
| G9, G10  | PBS                      | negative              |

**C**

| Position | Target/Control  | Phosphorylation Site |
|----------|-----------------|----------------------|
| A17, A18 | Reference Spot  | positive             |
| A13, A14 | p53             | S392                 |
| B11, B12 | Akt             | T308                 |
| B13, B14 | p53             | S46                  |
| C11, C12 | p70 S6 Kinase   | T389                 |
| C13, C14 | p53             | S15                  |
| C15, C16 | c-Jun           | S63                  |
| D11, D12 | p70 S6 Kinase   | T421/S424            |
| D13, D14 | RSK1/2/3        | S380/S386/S377       |
| D15, D16 | eNOS            | S1177                |
| E11, E12 | STAT3           | Y705                 |
| E13, E14 | p27             | T198                 |
| E15, E16 | PLC- $\gamma$ 1 | Y783                 |
| F11, F12 | STAT3           | S727                 |
| F13, F14 | WNK1            | T60                  |
| F15, F16 | PYK2            | Y402                 |
| G11, G12 | HSP60           | total                |
| G17, G18 | PBS             | negative             |

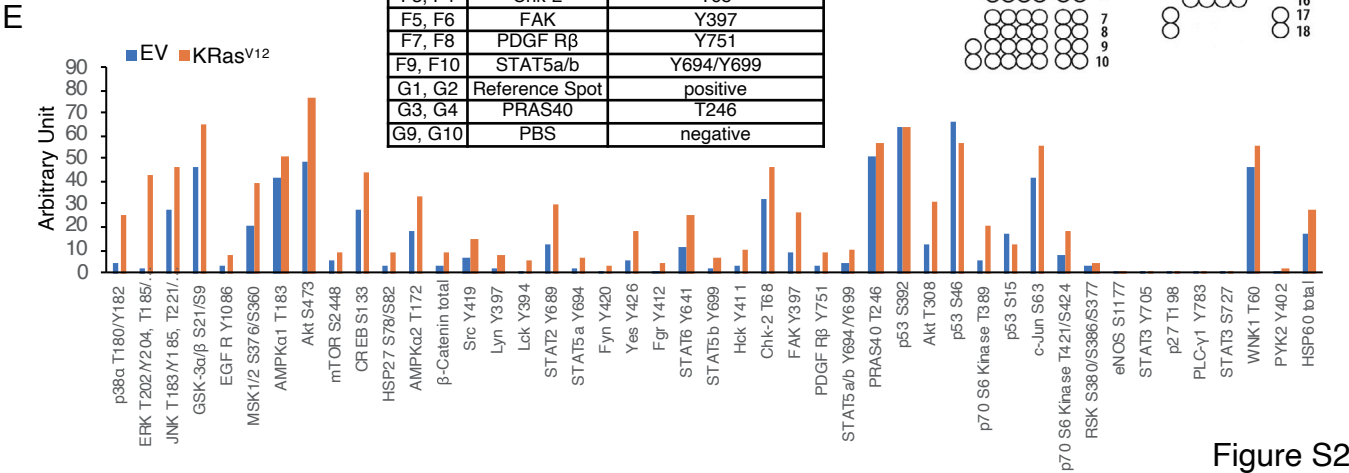

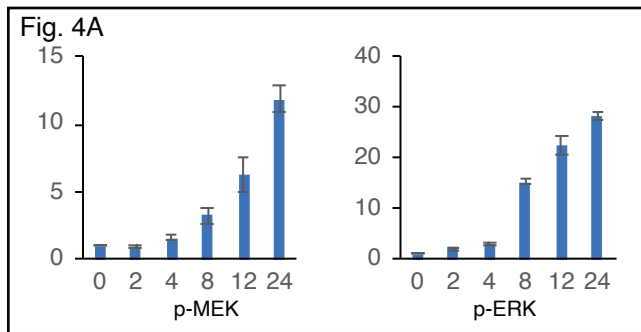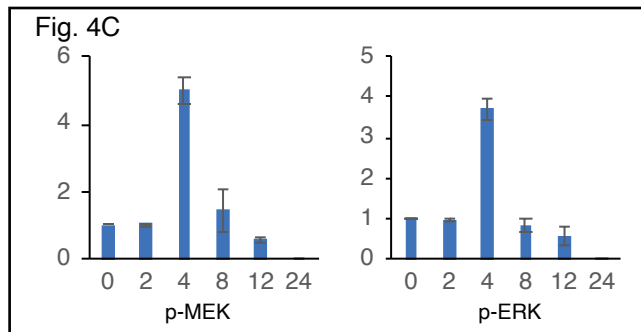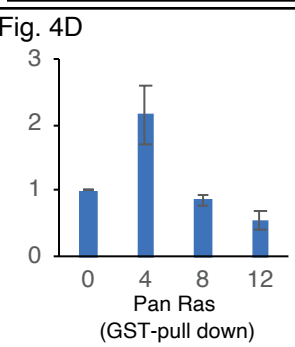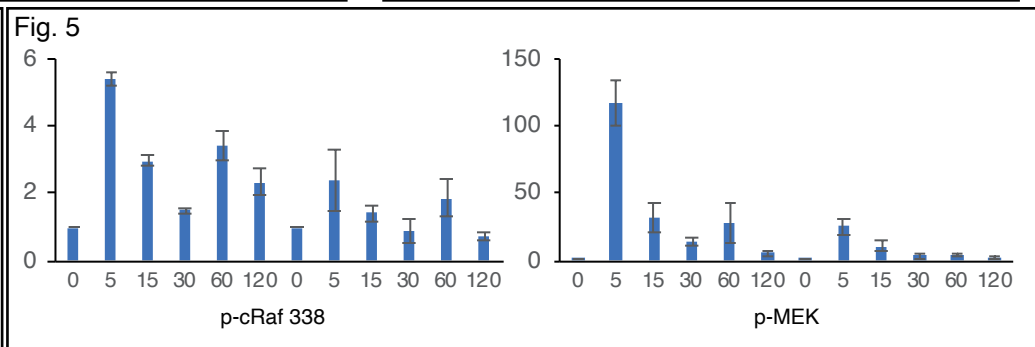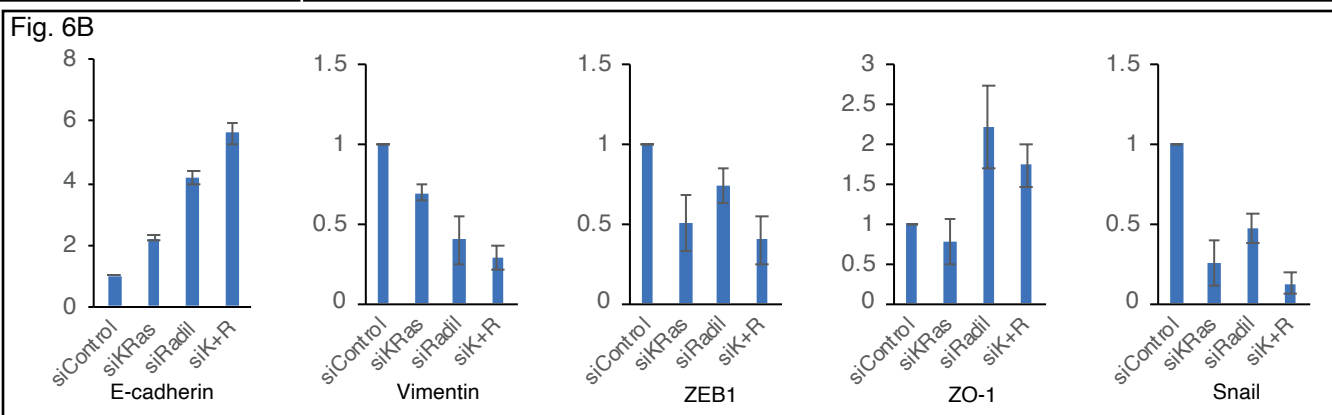

Figure S3

## Figure Legends (Supplemental Figures)

Figure S1. Specific down-regulation of Radil or KRas via RNAi. (A) Cells transfected siRNAs targeting two different stretches of Radil (upper panel) or KRas (lower panel). Control siRNAs were made by mutating key residues within targeting siRNAs. Sequences corresponding to these siRNAs are as follows: siRadil#R1 5' CCAAAGAACUAGCAGAGAAUU 3'; siRadil#R2 5' GGAGAAAACCAAAGAACUAAU 3'; siControl#R1 5' CCAAAGAUCUAAACAGAGAAUU 3'; siControl#R2 5' GGUGAAUACCAAAGAACUAAU 3'; siKRas#K1 5' CGAAUAUGAUCCAACAAUAAU 3'; siKRas#K2 5' AGCAAGAAGUUAUGGAAUUUU 3'; siControl#K1 5' CGAAUUUGAUCCAACAAUAAU 3'; siControl#K2 5' AGCAAGUAGUUAUGGAAUUUU 3'. (B) A549 cells transfected with Radil siRNAs (siRadil#R1) and/or KRas siRNAs (siRNA#K2) for 24 h. Respective control siRNAs (siControl#K2 or siControl#R1) as described in A were also used for transfection. Equal amounts of cell lysates were then blotted for Radil, KRas, E-cadherin, Vimentin, ZEB1, ZO-1, Snail, and actin. (C) A549 cells were transfected with Radil siRNAs (siRadil#R1) or control siRNAs (siControl#R1) for 24 h, starved in low (0.2%) FBS medium for 16 h, and then fed 20% serum for various times as indicated. Equal amounts of cell lysates were then blotted for Radil, phospho-cRaf 338, phospho-MEK, and actin. (D) 293FT cells engineered to express inducible Flag-Radil (293FT/Flag-Radil) were transfected with Radil siRNA (siRNA#R1) or control siRNA (siControl#R1) for 24 h and then treated with Dox for 24 h. Equal amounts of cell lysates were blotted for Flag, Radil, phospho-MEK, total MEK, and  $\beta$ -actin.

Figure S2. Phospho-kinase profiling via dot blotting analyses. (A) 293FT cells engineered to express inducible Flag tagged KRas<sup>V12</sup> (293FT/Flag-KRas<sup>V12</sup>) and 293FT control (CT) cells were starved in low FBS (0.2%) medium for 16 h, and then treated with doxycycline (Dox) for 24 h. Equal amounts of cell lysates were subjected to phospho-kinase profiling using the dot blot approach. Paired dot blot results are shown. (B-D) Detailed descriptions of protein kinases and their sites of phosphorylation being analyzed, as well as locations/orientations of each kinase on the blots. (E) Quantifications of kinase signals on the dot blots.

Figure S3. Specific signals presented in Figures 4, 5 and 6 were quantified. Results were plotted in histograms for comparison.
